RESEARCH ARTICLE

# Impact of point-of-care ultrasound on clinical decision-making at an urban emergency department in Tanzania

Teri Ann Reynolds<sup>1,2,3</sup>, Stas Amato<sup>4</sup>✉<sup>‡</sup>\*, Irene Kulola<sup>1‡</sup>, Chuan-Jay Jeffrey Chen<sup>5</sup>✉<sup>‡</sup>, Juma Mfinanga<sup>1‡</sup>, Hendry Robert Sawe<sup>1,2‡</sup>

**1** Emergency Medicine Department, Muhimbili National Hospital, Dar es Salaam, Tanzania, **2** Emergency Medicine Department, Muhimbili University of Health and Allied Sciences, Dar es Salaam, Tanzania, **3** Department of Emergency Medicine and Global Health Sciences, University of California San Francisco, San Francisco, California, United States of America, **4** School of Medicine and Dentistry, University of Rochester, Rochester, New York, United States of America, **5** School of Medicine, University of California San Francisco, San Francisco, California, United States of America

✉ These authors contributed equally to this work.

✉<sup>a</sup> Current address: Department of General Surgery, University of Vermont Medical Center, Burlington, Vermont, United States of America

✉<sup>b</sup> Current address: Department of Emergency Medicine, Massachusetts General Hospital, Boston, Massachusetts, United States of America

‡ These authors also contributed equally to this work.

\* [stas.amato@gmail.com](mailto:stas.amato@gmail.com)

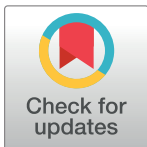

**OPEN ACCESS**

**Citation:** Reynolds TA, Amato S, Kulola I, Chen C-JJ, Mfinanga J, Sawe HR (2018) Impact of point-of-care ultrasound on clinical decision-making at an urban emergency department in Tanzania. PLoS ONE 13(4): e0194774. <https://doi.org/10.1371/journal.pone.0194774>

**Editor:** Takeru Abe, Yokohama City University, JAPAN

**Received:** July 31, 2017

**Accepted:** March 11, 2018

**Published:** April 25, 2018

**Copyright:** © 2018 Reynolds et al. This is an open access article distributed under the terms of the [Creative Commons Attribution License](https://creativecommons.org/licenses/by/4.0/), which permits unrestricted use, distribution, and reproduction in any medium, provided the original author and source are credited.

**Data Availability Statement:** Data are available at: <https://doi.org/10.5061/dryad.4tq73>.

**Funding:** The author(s) received no specific funding for this work. Muhimbili National Hospital provided logistic support.

**Competing interests:** The authors have declared that no competing interests exist.

## Abstract

### Background

Point of care ultrasound (PoCUS) is an efficient, inexpensive, safe, and portable imaging modality that can be particularly useful in resource-limited settings. However, its impact on clinical decision making in such settings has not been well studied. The objective of this study is to describe the utilization and impact of PoCUS on clinical decision making at an urban emergency department in Dar es Salaam, Tanzania.

### Methods

This was a prospective descriptive cross-sectional study of patients receiving PoCUS at Muhimbili National Hospital's Emergency Medical Department (MNH EMD). Data on PoCUS studies during a period of 10 months at MNH EMD was collected on consecutive patients during periods when research assistants were available. Data collected included patient age and sex, indications for ultrasound, findings, interpretations, and provider-reported diagnostic impression and disposition plan before and after PoCUS. Descriptive statistics, including medians and interquartile ranges, and counts and percentages, are reported. Pearson chi squared tests and p-values were used to evaluate categorical data for significant differences.

### Results

PoCUS data was collected for 986 studies performed on 784 patients. Median patient age was 32 years; 56% of patients were male. Top indications for PoCUS included trauma,

respiratory presentations, and abdomino-pelvic pain. The most frequent study types performed were eFAST, cardiac, and obstetric or gynaecologic studies. Overall, clinicians reported that the use of PoCUS changed either diagnostic impression or disposition plan in 29% of all cases. Rates of change in diagnostic impression or disposition plan increased to 45% in patients for whom more than one PoCUS study type was performed.

## Conclusions

In resource-limited emergency care settings, PoCUS can be utilized for a wide range of indications and has substantial impact on clinical decision making, especially when more than one study type is performed.

## Introduction

Point-of-care ultrasound (PoCUS) has been shown to improve diagnostic accuracy;[\[1–10\]](#) facilitate faster diagnosis, consultation and definitive treatment;[\[10–19\]](#) and decrease complication rates when used for procedural guidance.[\[20–23\]](#) PoCUS is affordable and cost-effective,[\[19,22–25\]](#) has been shown to reduce the use of more invasive and expensive diagnostic modalities,[\[24–27\]](#) and has been shown to be effective when performed by a variety of clinical providers in a range of clinical settings.[\[27–36\]](#)

All of these qualities make PoCUS particularly suited for resource-limited settings where other imaging modalities may be unavailable, impractical, or expensive, and patient transfer for radiology services may be burdensome or impossible. There has been a substantial increase in the use of PoCUS in resource-limited settings over the past decade,[\[11,34–54\]](#) but there is limited information on the impact of PoCUS on clinical decision-making in such settings. In Rwanda, pilot studies have shown that training in bedside ultrasound is feasible in a rural district hospital and that its use changes diagnosis in over 40% of cases.[\[45\]](#) In Liberia, the temporary introduction of ultrasound changed diagnosis in 30% to 60% of cases, depending on indication.[\[51\]](#)

Muhimbili National Hospital (MNH), Tanzania's largest national referral hospital and the main teaching hospital of the Muhimbili University of Health and Allied Sciences (MUHAS), opened the country's first full capacity emergency department in January 2010, the Emergency Medical Department (EMD). The MNH EMD is the main intake area for medical and surgical patients at this national public referral hospital with an annual volume of approximately 40,000 patients per year at the time of this study.[\[55,56\]](#) The availability of radiology studies at MNH EMD is limited by cost, time of day, extended wait times, and by distance for unstable patients who cannot be transported out of the emergency care area. Radiology-performed ultrasound services are available at MNH, though often with substantial delay, which limits their utility for clinical decision-making in the emergency department. Computed tomography (CT) is available, though its accessibility can be limited by service interruptions, or by a requirement for pre-payment for some patients. The emergency medicine residency program at MNH has fully incorporated PoCUS training into its curriculum, and inservice training is provided for all registrar (non-specialist) doctors working in the EMD [\[50\]](#). MNH EMD providers frequently perform PoCUS for a range of indications. Previous research at MNH has shown that temporary introduction of bedside ultrasound to a surgical service accelerated diagnostic workup, shortened hospitalization, and may have helped avoid laparotomy in some cases, but there has been no study of the utilization of PoCUS in the MNH emergency

department setting.[48] We aimed to characterize the utilization and impact of PoCUS on clinical decision-making in the MNH EMD.

## Methods

This is a prospective descriptive cross-sectional study of PoCUS at MNH EMD. This study was approved by the institutional review boards of Muhimbili National Hospital and the University of California, San Francisco, and, given the anonymity of the data collected, informed consent was waived by both institutional review boards. A standardised data collection form was used by a research assistant on each ultrasound performed during times when research assistants were available in the department within a ten-month period (August 2014 to May 2015). Research assistants were trained to complete the data collection form, and collected responses from providers performing ultrasound examinations in real time. The availability of research assistants was determined entirely by other administrative staffing considerations and was not correlated with clinical staffing or patient volume. At the time of this study, EMD providers performing PoCUS included 12 specialist attending physicians, 10 resident physicians and 17 registrars. All ultrasound studies were performed with a SonoSite mTurbo (SonoSite Corp., Bothell, WA).

Providers followed specific protocols for each type of scan and reported on image adequacy, findings, and interpretation. The MNH EMD protocols were derived from existing university and professional society guidelines and the Partners in Health Manual for Ultrasound in Resource-Limited Settings.[57] For extended focused assessment with sonography for trauma (eFAST), views were obtained for the hepatorenal, pericardial, perisplenic, suprapubic, bilateral costophrenic angles, and bilateral lungs; providers indicated if free fluid and/or lung sliding were visualized. For thoracic scans, views were obtained of bilateral lungs, which were assessed for pleural fluid, b-lines, and/or parenchymal consolidations. For cardiac scans, providers obtained parasternal long, parasternal short, apical four chamber, subxiphoid four chamber, and subxiphoid long axis (IVC) views and assessed for pericardial effusion, global systolic function, chamber size, and IVC collapsibility. For abdominal scans, views were obtained of the aorta (both transverse and longitudinal) and/or the gallbladder (long and short axes), and providers assessed for abdominal aorta diameter, gallstones/sludge, gallbladder wall-thickening, pericholecystic fluid, and/or dilatation of the extrahepatic bile ducts. For OB/GYN scans, providers performed transabdominal and/or transvaginal scans and assessed for intrauterine pregnancy, adnexal masses, and/or fetal heart activity. For urologic/renal exams, both transverse and longitudinal views were obtained of the bladder and kidneys, which were assessed for hydronephrosis, calculi, and cysts/masses. For DVT scans, views were obtained of the proximal, middle, and distal femoral veins and the popliteal veins, which were assessed for compressibility. For soft tissue studies, scans assessed for fluid collections, evidence of peripheral oedema and evidence of fracture, as relevant. Other findings, such as intussusception, situs inversus and ocular findings, were occasionally reported in the free text 'other' section of the data form.

Case data collected included patient age and sex, indications for ultrasound, ultrasound findings, provider-reported diagnostic impression and disposition plan before and after ultrasound. This information was transcribed from handwritten forms and entered into Stata (version 14) for data analysis. Descriptive statistics including medians and interquartile ranges, and counts and percentages, are reported. Pearson chi squared tests were applied to categorical data and p-values were used to evaluate for significant differences.

We report on patient characteristics including age, sex, and proportion presenting for injury or pregnancy (Table 1). Frequency and proportions were tabulated for PoCUS

**Table 1. Patient characteristics.**

| Patient Characteristics                              |                |
|------------------------------------------------------|----------------|
| Median age, years (IQR)                              | 32 (23–50)     |
| Adult (> 18 years) % (n) <sup>a</sup>                | 79.3 (622/784) |
| Male % (n) <sup>b</sup>                              | 55.8 (434/778) |
| Pregnant patients, as % of females (n)               | 16.6 (57/344)  |
| Trauma patients, as % of total (n)                   | 42.1 (330/784) |
| Patients with abnormal reported PoCUS findings % (n) | 48.7 (382/784) |

Characteristics of patients who underwent point of care ultrasound.

<sup>a</sup> There is missing data for age on 55 (7%) patients.

<sup>b</sup> There is missing data for sex on 6 (<1%) patients.

<https://doi.org/10.1371/journal.pone.0194774.t001>

indications and study types (Tables 2 and 3 respectively). Proportions are described to be out of total patients and/or out of total scans as relevant, since many patients underwent more than one PoCUS study. In particular, impact was measured based on reported change of diagnostic impression or disposition plan for each patient (Table 4), and proportions are reported relative to total patients. A Pearson chi squared test was utilized to examine whether there was a difference in impact on clinical decision-making between different study types and number of diagnostic study types (Tables 5 and 6 respectively). Frequency and proportions were tabulated for post-ultrasound diagnostic impressions which were coded and aggregated into categories based on Clinical Classification Software categories (Table 7). [58] Frequency and proportions of patient post-ultrasound disposition plans were tabulated (Table 8).

## Results

### Patient characteristics

Data were collected on 986 studies performed on 784 patients. The majority of patients (79%) were adults over the age of 18 years, and the median patient age was 32 (Table 1). There were 55 patients (7%) for whom age was not recorded. Six patients (<1%) were missing documentation of sex. Among patients with documented sex, 55.8% were male. Of the female patients, 16.6% were pregnant by history or testing. Trauma patients made up 42% of this sample, and of the trauma patients, 73% were male.

### Ultrasound indications

Providers reported a clinical indication for ultrasound in 97% of patients. More than one indication was reported in 22.1% of patients overall. The top indications for ultrasound were trauma, (non-traumatic) respiratory presentations, and (non-traumatic) abdomino-pelvic pain (Table 2). Patient indications that most commonly associated with abnormal ultrasound findings included hypotension/shock (85%), peripheral oedema (85%), and respiratory complaints (84.5%).

### Ultrasound study type

Including the use of PoCUS for procedures, 157 (20.0%) patients had more than one type of ultrasound study. The most frequent ultrasound study types were eFAST, cardiac and obstetric/gynaecologic (Table 3). Study types that were most commonly associated with abnormal ultrasound findings included thoracic (84.4%), renal (82.1%) and cardiac (80.5%).

**Table 2. Top indications for PoCUS.**

| Indications for Ultrasound <sup>a</sup> | n (%)      | Abnormal Findings, n (%) |
|-----------------------------------------|------------|--------------------------|
| Trauma                                  | 330 (42.1) | 62 (18.8)                |
| Respiratory <sup>b</sup>                | 168 (21.4) | 142 (84.5)               |
| Abdomino-Pelvic Pain                    | 114 (14.5) | 77 (67.5)                |
| Procedure                               | 45 (5.7)   | 21 (46.7)                |
| Abdominal Distension                    | 41 (5.2)   | 31 (75.6)                |
| Tachycardia                             | 35 (4.5)   | 25 (71.4)                |
| Pregnancy                               | 33 (4.2)   | 27 (81.8)                |
| Vaginal Bleeding                        | 28 (3.6)   | 20 (71.4)                |
| Chest Pain                              | 26 (3.3)   | 18 (69.2)                |
| Cardiac Arrest                          | 22 (2.8)   | 19 (86.4)                |
| Peripheral Oedema                       | 20 (2.6)   | 17 (85.0)                |
| Hypotension/Shock                       | 20 (2.6)   | 17 (85.0)                |
| Palpitations                            | 19 (2.4)   | 14 (73.6)                |
| Altered Mental Status                   | 18 (2.3)   | 12 (66.7)                |
| Decreased Urinary Output                | 11 (1.4)   | 9 (81.8)                 |
| Fever                                   | 11 (1.4)   | 7 (63.6)                 |
| Other Indications                       | 59 (7.5)   | 41 (69.5)                |
| Missing                                 | 24 (3.1)   | 12 (50.0)                |
| Total                                   | 1024       | 571 (55.8)               |

Provider reported indications for point of care ultrasound.

<sup>a</sup> More than one indication was reported in 173 (22.1%) patients.

<sup>b</sup> Respiratory presentations included dyspnoea, orthopnoea, hypoxia, tachypnoea.

<https://doi.org/10.1371/journal.pone.0194774.t002>

### Ultrasound guided procedures

A total of 45 patients, 5.7% of this sample, underwent one or more ultrasound-guided procedures. Twenty-three of these patients underwent only procedural ultrasound for central or peripheral vascular access and are not included in the denominator for Tables 4, 5 and 6 on impact. The most frequent procedures were central venous access (23) and peripheral venous

**Table 3. Frequency of ultrasound study types.**

| PoCUS Type <sup>a</sup> | n (%)      | Abnormal Findings, n (%) |
|-------------------------|------------|--------------------------|
| eFAST                   | 467 (59.6) | 161 (34.5)               |
| Cardiac                 | 215 (27.4) | 173 (80.5)               |
| OB/GYN                  | 79 (10.1)  | 58 (73.4)                |
| Thoracic                | 64 (8.2)   | 54 (84.4)                |
| Abdominal               | 57 (7.3)   | 40 (70.2)                |
| Procedure               | 45 (4.6)   | 21 (46.7)                |
| Renal                   | 39 (5.0)   | 32 (82.1)                |
| LE Doppler              | 10 (1.3)   | 8 (80.0)                 |
| Musculoskeletal         | 10 (1.3)   | 8 (80.0)                 |
| <b>Total</b>            | <b>986</b> | <b>534 (54.2)</b>        |

Ultrasound study types utilized by providers and frequency of abnormal findings.

<sup>a</sup> More than one ultrasound study type was utilized in 157 (20.0%) patients.

<https://doi.org/10.1371/journal.pone.0194774.t003>

**Table 4. Reported impact of ultrasound on clinical decision-making.**

| Impact on Clinical Decision-Making                  | % of Patients (n) <sup>a</sup> | CI (95%)  |
|-----------------------------------------------------|--------------------------------|-----------|
| Change in Diagnostic Impression                     | 27.0 (203)                     | 23.9–30.4 |
| Change in Disposition Plan                          | 13.1 (99)                      | 10.8–15.8 |
| Change in Diagnostic Impression or Disposition Plan | 28.8 (217)                     | 25.6–32.2 |

Impact of point of care ultrasound on clinical decision-making reported as change in diagnostic impression or change in disposition plan.

<sup>a</sup> There is missing data for diagnosis and disposition on 8 (1%) of patients.

<https://doi.org/10.1371/journal.pone.0194774.t004>

access (7). Other ultrasound-guided procedures included thoracentesis (5), paracentesis (4), pericardiocentesis (3), and thoracostomy (2).

### Impact on clinical decision-making

Of the 761 patients that underwent a diagnostic ultrasound study, clinician-reported diagnostic impressions changed in 27% and disposition plans changed in 13% of patients after ultrasound. A change in either diagnostic impression or disposition plan was reported for 28.8% patients overall (95% CI: 25.6–32.2%). Eight patients (1%) had missing data for diagnosis and disposition and are not included in the denominator for Tables 4 and 5.

When only one ultrasound study was utilized, there were no significant differences in impact on clinical decision-making among study types (see Table 5). Among all patients, including those for whom more than one ultrasound study was performed, renal and thoracic studies were found to have significantly higher rates of impact than other study types.

Rates of reported change in diagnostic impression or disposition plan following ultrasound significantly increased with the number of studies performed (Table 6). When providers performed only one PoCUS study type, they reported a change in diagnostic impression or disposition plan in 25.1% of cases. Among patients for whom two PoCUS study types were performed, providers reported a change in either diagnostic impression or disposition plan in 45.2% of cases, and among patients for whom three PoCUS studies were performed, providers reported a change in either diagnostic impression or disposition plan in 47.1% of cases.

**Table 5. Change in diagnostic impression or disposition plan by study type.**

| Study Type      | All patients (n = 753)            |                | Patients with 1 study type (n = 614) |               | Patients with > 1 study type <sup>a</sup> (n = 139) |               |
|-----------------|-----------------------------------|----------------|--------------------------------------|---------------|-----------------------------------------------------|---------------|
|                 | Change in Dx or Dispo % (n/total) | Chi2 (p)       | Change in Dx or Dispo % (n/total)    | Chi2 (p)      | Change in Dx or Dispo % (n/total)                   | Chi2 (p)      |
| Renal           | 46.2 (18/39)                      | 6.026 (0.014)* | 38.1 (8/21)                          | 1.960 (0.162) | 55.6 (10/18)                                        | 0.874 (0.350) |
| Thoracic        | 45.2 (28/62)                      | 8.797 (0.003)* | 33.3 (4/12)                          | 0.444 (0.505) | 48.0 (24/50)                                        | 0.226 (0.635) |
| OB/GYN          | 39.0 (30/77)                      | 4.302 (0.038)  | 34.5 (19/55)                         | 2.880 (0.090) | 50.0 (11/22)                                        | 0.231 (0.631) |
| Musculoskeletal | 30.0 (3/10)                       | 0.007 (0.934)  | 25.0 (2/8)                           | 0.000 (0.996) | 50.0 (1/2)                                          | 0.018 (0.984) |
| LE Doppler      | 30.0 (3/10)                       | 0.007 (0.934)  | 25.0 (2/8)                           | 0.000 (0.996) | 50.0 (1/2)                                          | 0.018 (0.984) |
| eFAST           | 29.7 (137/461)                    | 0.469 (0.493)  | 25.1 (89/354)                        | 0.002 (0.968) | 44.9 (48/107)                                       | 0.040 (0.841) |
| Cardiac         | 29.1 (62/213)                     | 0.012 (0.912)  | 19.7 (26/132)                        | 2.594 (0.107) | 44.4 (36/81)                                        | 0.061 (0.806) |
| Abdominal       | 26.8 (15/56)                      | 0.122 (0.727)  | 16.7 (4/24)                          | 0.941 (0.332) | 34.4 (11/32)                                        | 2.011 (0.156) |
| <b>Total</b>    | 28.8 (217/753)                    |                | 25.1 (154/614)                       |               | 45.3 (63/139)                                       |               |

Impact of point of care ultrasound on clinical decision-making by study type.

<sup>a</sup> Among patients with recorded diagnosis and disposition, there were 139 patients with greater than one study type.

<https://doi.org/10.1371/journal.pone.0194774.t005>

**Table 6. Change in diagnostic impression or disposition plan by number of diagnostic studies.**

| Number of PoCUS Studies | % of Patients with Change in Diagnosis or Disposition (n/total) | CI (95%)  | Chi <sup>2</sup> (p) |
|-------------------------|-----------------------------------------------------------------|-----------|----------------------|
| 1                       | 25.1 (154/614)                                                  | 21.7–28.7 | 22.640 (0.000)       |
| 2                       | 45.2 (47/104)                                                   | 35.4–55.3 | 15.771 (0.000)       |
| 3                       | 47.1 (16/34)                                                    | 29.8–64.9 | 5.776 (0.016)        |
| 4                       | 0.0 (0/1)                                                       | 0–97.5    | 0.405 (0.524)        |
| Total                   | 28.8 (217/753)                                                  |           |                      |

Impact on clinical decision-making by number of diagnostic studies.

<https://doi.org/10.1371/journal.pone.0194774.t006>

Overall, in patients for whom greater than one PoCUS study was performed, there was a 45.3% rate of change in diagnosis and disposition.

### Post-ultrasound diagnostic impressions and disposition plans

Post-ultrasound diagnostic impressions and disposition plans are displayed in Tables 7 and 8. Diagnostic impressions were coded based on the Clinical Classification Software[58] categories and aggregated into categories of trauma (42.1%), cardiovascular (20.0%), abdomino-pelvic (14.3%), pregnancy (8.5%), infectious (7.4%), pulmonary (6.8%), neoplasm (2.8%), and determination of death (2.7%). Multiple diagnoses were recorded for 6.8% of patients.

The most common disposition plan was to Muhimbili Orthopaedic Institute (MOI), a semi-independent institute within MNH, which provides orthopaedic and neurosurgical services. Other common disposition plans included cardiology, general medical, general surgical, and obstetric and gynaecologic units. Six patients (0.8%) had multiple dispositions reported (Table 8).

### Discussion

As ultrasound technology has become more portable and affordable, PoCUS has shown increasing promise in low-resource settings as a reliable tool for both diagnosis and treatment. [20–23] This study describes 986 scans performed for 784 patients seen at the emergency department of the largest public referral and teaching hospital in Tanzania. Over 50 distinct indications for ultrasound were recorded. The top indication for ultrasound was trauma, followed by respiratory presentations and abdomino-pelvic pain.

There was a high rate of utilization of ultrasound for eFAST, which accounted for over half the scans performed in this study. Cardiac, obstetric or gynecologic, thoracic, abdominal, and renal studies were also common, though prior studies have found higher relative rates of utilization for obstetric and gynecologic applications. These studies were conducted in smaller rural hospitals (Rwanda) or among inpatients (Liberia), rather than at a dedicated emergency department in an urban center, which may have influenced the relative prevalence of acute trauma in our study population.[45,51] In addition, many pregnant patients presenting acutely to Muhimbili are evaluated directly by obstetric services, rather than being assessed and treated in the emergency department, and this likely influenced our results.

PoCUS had a substantial impact on patient care, changing diagnostic impression or disposition plan in 28.8% of cases overall. While all study types had impact on clinical decision-making, renal and thoracic studies had the highest. The overall impact on clinical decision-making in this study is lower than previous studies in Sub-Saharan Africa, which may be attributable



**Table 7. Post-ultrasound provider-reported diagnostic impressions.**

| <b>Diagnostic Impression</b>          | <b>n</b>   | <b>%</b>    |
|---------------------------------------|------------|-------------|
| <b>Trauma</b>                         | <b>330</b> | <b>42.1</b> |
| Intracranial injury                   | 134        | 17.1        |
| Extremity fracture(s)                 | 76         | 9.7         |
| Other fracture(s)                     | 23         | 2.9         |
| Other trauma                          | 112        | 14.3        |
| <b>Cardiovascular</b>                 | <b>157</b> | <b>20.0</b> |
| Heart failure                         | 70         | 8.9         |
| Cardiomyopathy                        | 19         | 2.4         |
| Pericardial effusion                  | 18         | 2.3         |
| Hypertension                          | 13         | 1.7         |
| Arrhythmia                            | 7          | 0.9         |
| Valve disease                         | 6          | 0.8         |
| Venous thrombosis or embolism         | 6          | 0.8         |
| Aortic aneurysm or dissection         | 5          | 0.6         |
| Other cardiovascular                  | 39         | 5.0         |
| <b>Abdomino-pelvic</b>                | <b>112</b> | <b>14.3</b> |
| Renal failure                         | 19         | 2.4         |
| Other renal and urinary tract disease | 21         | 2.7         |
| Hepatobiliary disease                 | 14         | 1.8         |
| Female reproductive disease           | 6          | 0.8         |
| Other abdomino-pelvic                 | 50         | 6.4         |
| <b>Pregnancy</b>                      | <b>67</b>  | <b>8.5</b>  |
| Ectopic pregnancy                     | 18         | 2.3         |
| Spontaneous abortion                  | 15         | 1.9         |
| Other pregnancy related complications | 35         | 4.5         |
| <b>Infectious</b>                     | <b>58</b>  | <b>7.4</b>  |
| Tuberculosis                          | 13         | 1.7         |
| Septicemia                            | 12         | 1.5         |
| Pneumonia                             | 11         | 1.4         |
| Peritonitis                           | 8          | 1.0         |
| Meningitis                            | 3          | 0.4         |
| Other infectious                      | 19         | 2.4         |
| <b>Pulmonary</b>                      | <b>53</b>  | <b>6.8</b>  |
| Pulmonary edema                       | 18         | 2.3         |
| Pleural effusion                      | 18         | 2.3         |
| Pneumothorax                          | 9          | 1.1         |
| Hemothorax                            | 5          | 0.6         |
| Asthma or COPD                        | 4          | 0.5         |
| Pulmonary embolism                    | 1          | 0.1         |
| <b>Neoplasms</b>                      | <b>22</b>  | <b>2.8</b>  |
| <b>Death determination</b>            | <b>21</b>  | <b>2.7</b>  |
| <b>Other</b>                          | <b>17</b>  | <b>2.2</b>  |
| <b>Missing</b>                        | <b>33</b>  | <b>4.2</b>  |

Provider-reported diagnostic impressions after ultrasound.

<https://doi.org/10.1371/journal.pone.0194774.t007>



**Table 8. Post-ultrasound disposition plans.**

| Disposition Plans                            | n   | %    | CI (95%)  |
|----------------------------------------------|-----|------|-----------|
| Muhimbili Orthopaedic Institute <sup>a</sup> | 260 | 34.7 | 29.9–36.6 |
| Cardiology                                   | 112 | 14.9 | 11.9–16.9 |
| General Medical                              | 102 | 13.6 | 10.7–15.6 |
| General Surgery                              | 67  | 8.9  | 6.7–10.7  |
| Obstetrics/Gynecology                        | 66  | 8.8  | 6.6–10.6  |
| Operating Theatre                            | 37  | 4.9  | 3.4–6.4   |
| Discharge                                    | 33  | 4.4  | 2.9–5.9   |
| Pediatric                                    | 26  | 3.5  | 2.2–4.8   |
| Surgical Sub-Specialty                       | 26  | 3.5  | 2.2–4.8   |
| Mortuary                                     | 21  | 2.8  | 1.7–4.1   |
| Intensive Care Unit                          | 4   | 0.5  | 0.1–1.3   |
| Burn                                         | 1   | 0.1  | 0.0–0.7   |
| Ophthalmology                                | 1   | 0.1  | 0.0–0.7   |
| Missing                                      | 34  | 4.3  |           |

Provider-reported disposition plans after ultrasound

<sup>a</sup>The Muhimbili Orthopaedic Institute (MOI) is a semi-independent institute on the MNH campus providing orthopaedic and neurosurgical services.

<https://doi.org/10.1371/journal.pone.0194774.t008>

to the differences in presenting complaints or provider skill, MNH’s status as a referral facility (such that many patients present with some diagnostic results in hand), or the relative availability of other resources to support diagnosis. In our study, similar to prior studies, change in disposition plan was reported less frequently than change in diagnostic impression.

Interestingly, PoCUS led to significantly more changes in diagnostic impression or disposition plan (up to 47%) among patients undergoing multiple studies. This pattern spans all study types and may suggest that providers perform more ultrasound studies in patients for whom there is greater diagnostic uncertainty, and/or that clinical data from additional PoCUS studies helps providers identify new or additional diagnoses.

## Limitations

This study has several limitations. First, the study is based on provider-reported data. While providers were asked to report the pre-ultrasound diagnostic impression prior to performing the ultrasound, we could not ensure that this protocol was followed in all cases. This effect would, however, be expected to underestimate the actual impact of PoCUS (if we assume that providers are more likely to report a ‘pre’-ultrasound diagnostic impression consistent with ultrasound findings), so our results should represent at least a minimum level of impact. In addition, data were recorded in real time during the clinical encounter, which should mitigate recall bias and increase accurate reporting. Because research assistants were not available to record ultrasound impressions at all times, this study may not accurately characterize all ultrasound utilization at the site. However, this is mitigated by the enrolment of consecutive patients during periods in which research assistants were available.

We did not, however, verify the quality or accuracy of the ultrasound studies and interpretations; we report only on the relationship between reported findings and reported diagnoses/dispositions. Ultrasound is a highly operator-dependent imaging modality, and while there are ongoing quality control efforts at the site comparing the provider interpretation of saved

studies with those of independent evaluators, this study does not provide any information on the accuracy of provider diagnoses or quality of ultrasound studies performed.

Finally, there were some missing data for some patients. Based on discussions with providers and research staff, this most often occurred due to high patient volume and limited time to complete the form. The impact of this, however, is unlikely to reflect systematic bias, and its impact should in any case be limited, as missing data occurred at a maximum rate of 7% (age of patient). In order to allow readers to assess the importance of this limitation, we have identified the rate of missing data in text for each section of results.

## Conclusion

This study demonstrates the impact of PoCUS on clinical decision-making at a public urban emergency department in East Africa. PoCUS substantially impacted clinicians' decisions on diagnostic impressions and, less often, on disposition plans. More studies are needed to evaluate the quality accuracy of PoCUS, and the impact of PoCUS on clinical interventions and outcomes, in such settings. Overall, this study contributes to a longitudinal understanding of the evolving implementation and utilization of PoCUS in the region.

## Acknowledgments

We wish to acknowledge David Amato for his work on data entry and analysis and Joseph Mlinder for his work on data collection.

## Author Contributions

**Conceptualization:** Teri Ann Reynolds, Irene Kulola, Juma Mfinanga, Hendry Robert Sawe.

**Data curation:** Stas Amato, Irene Kulola, Chuan-Jay Jeffrey Chen, Hendry Robert Sawe.

**Formal analysis:** Teri Ann Reynolds, Stas Amato, Chuan-Jay Jeffrey Chen, Hendry Robert Sawe.

**Investigation:** Teri Ann Reynolds, Stas Amato, Irene Kulola, Chuan-Jay Jeffrey Chen, Juma Mfinanga, Hendry Robert Sawe.

**Methodology:** Teri Ann Reynolds, Stas Amato, Chuan-Jay Jeffrey Chen, Juma Mfinanga, Hendry Robert Sawe.

**Project administration:** Teri Ann Reynolds, Stas Amato, Irene Kulola, Chuan-Jay Jeffrey Chen, Juma Mfinanga, Hendry Robert Sawe.

**Resources:** Teri Ann Reynolds, Irene Kulola, Juma Mfinanga, Hendry Robert Sawe.

**Software:** Teri Ann Reynolds, Hendry Robert Sawe.

**Supervision:** Teri Ann Reynolds, Irene Kulola, Juma Mfinanga, Hendry Robert Sawe.

**Validation:** Teri Ann Reynolds, Stas Amato, Irene Kulola, Juma Mfinanga, Hendry Robert Sawe.

**Visualization:** Teri Ann Reynolds.

**Writing – original draft:** Teri Ann Reynolds, Stas Amato, Chuan-Jay Jeffrey Chen.

**Writing – review & editing:** Teri Ann Reynolds, Stas Amato, Irene Kulola, Chuan-Jay Jeffrey Chen, Juma Mfinanga, Hendry Robert Sawe.

## References

1. Vrablik ME, Snead GR, Minnigan HJ, Kirschner JM, Emmett TW, Seupaul RA. The diagnostic accuracy of bedside ocular ultrasonography for the diagnosis of retinal detachment: a systematic review and meta-analysis. *Ann Emerg Med*. 2015; 65: 199–203.e1. <https://doi.org/10.1016/j.annemergmed.2014.02.020> PMID: 24680547
2. Wilkerson RG, Stone MB. Sensitivity of bedside ultrasound and supine anteroposterior chest radiographs for the identification of pneumothorax after blunt trauma. *Acad Emerg Med Off J Soc Acad Emerg Med*. 2010; 17: 11–17. <https://doi.org/10.1111/j.1553-2712.2009.00628.x> PMID: 20078434
3. Godown J, Lu JC, Beaton A, Sable C, Mirembe G, Sanya R, et al. Handheld echocardiography versus auscultation for detection of rheumatic heart disease. *Pediatrics*. 2015; 135: e939–944. <https://doi.org/10.1542/peds.2014-2774> PMID: 25780068
4. Tunuka CE, Wangoda R, Bugeza S, Galukande M. Emergency sonography AIDS diagnostic accuracy of torso injuries: a study in a resource limited setting. *Emerg Med Int*. 2014; 2014: 978795. <https://doi.org/10.1155/2014/978795> PMID: 25114805
5. Hyacinthe A-C, Broux C, Francony G, Genty C, Bouzat P, Jacquot C, et al. Diagnostic accuracy of ultrasonography in the acute assessment of common thoracic lesions after trauma. *Chest*. 2012; 141: 1177–1183. <https://doi.org/10.1378/chest.11-0208> PMID: 22016490
6. Joshi N, Lira A, Mehta N, Paladino L, Sinert R. Diagnostic Accuracy of History, Physical Examination, and Bedside Ultrasound for Diagnosis of Extremity Fractures in the Emergency Department: A Systematic Review. *Acad Emerg Med*. 2013; 20: 1–15. <https://doi.org/10.1111/acem.12058> PMID: 23570473
7. Dubrovsky AS, Kempinska A, Bank I, Mok E. Accuracy of ultrasonography for determining successful realignment of pediatric forearm fractures. *Ann Emerg Med*. 2015; 65: 260–265. <https://doi.org/10.1016/j.annemergmed.2014.08.043> PMID: 25441249
8. Abbasi S, Farsi D, Hafezimoghadam P, Fathi M, Zare MA. Accuracy of emergency physician-performed ultrasound in detecting traumatic pneumothorax after a 2-h training course: *Eur J Emerg Med*. 2013; 20: 173–177. <https://doi.org/10.1097/MEJ.0b013e328356f754> PMID: 22828649
9. Costantino TG, Bruno EC, Handly N, Dean AJ. Accuracy of emergency medicine ultrasound in the evaluation of abdominal aortic aneurysm. *J Emerg Med*. 2005; 29: 455–460. <https://doi.org/10.1016/j.jemermed.2005.02.016> PMID: 16243207
10. Zhang M, Liu Z-H, Yang J-X, Gan J-X, Xu S-W, You X-D, et al. Rapid detection of pneumothorax by ultrasonography in patients with multiple trauma. *Crit Care*. 2006; 10: R112. <https://doi.org/10.1186/cc5004> PMID: 16882338
11. Gingrich AS, Saul T, Lewiss RE. Point-of-care ultrasound in a resource-limited setting: diagnosing intussusception. *J Emerg Med*. 2013; 45: e67–70. <https://doi.org/10.1016/j.jemermed.2013.03.030> PMID: 23777777
12. Tayal VS, Hasan N, Norton HJ, Tomaszewski CA. The effect of soft-tissue ultrasound on the management of cellulitis in the emergency department. *Acad Emerg Med Off J Soc Acad Emerg Med*. 2006; 13: 384–388. <https://doi.org/10.1197/j.aem.2005.11.074> PMID: 16531602
13. Kozaci N, Ay MO, Kesapli M, Akcimen M, Sasmaz I, Turhan G, et al. The effectiveness of bedside point-of-care ultrasonography in the diagnosis and management of metacarpal fractures. *Am J Emerg Med*. 2015; <https://doi.org/10.1016/j.ajem.2015.06.052> PMID: 26175338
14. Adhikari S, Stolz L, Amini R, Blaivas M. Impact of point-of-care ultrasound on quality of care in clinical practice. *Rep Med Imaging*. 2014; 81. <https://doi.org/10.2147/RMI.S40095>
15. Rodgerson JD, Heegaard WG, Plummer D, Hicks J, Clinton J, Sterner S. Emergency department right upper quadrant ultrasound is associated with a reduced time to diagnosis and treatment of ruptured ectopic pregnancies. *Acad Emerg Med Off J Soc Acad Emerg Med*. 2001; 8: 331–336.
16. Reed MJ, Cheung L-T. Emergency department led emergency ultrasound may improve the time to diagnosis in patients presenting with a ruptured abdominal aortic aneurysm: *Eur J Emerg Med*. 2014; 21: 272–275. <https://doi.org/10.1097/MEJ.000000000000077> PMID: 23995666
17. Fox JC, Irwin Z. Emergency and critical care imaging. *Emerg Med Clin North Am*. 2008; 26: 787–812, ix–x. <https://doi.org/10.1016/j.emc.2008.05.003> PMID: 18655945
18. Thamburaj R, Sivitz A. Does the use of bedside pelvic ultrasound decrease length of stay in the emergency department? *Pediatr Emerg Care*. 2013; 29: 67–70. <https://doi.org/10.1097/PEC.0b013e31827b53f9> PMID: 23283267
19. Melniker LA, Leibner E, McKenney MG, Lopez P, Briggs WM, Mancuso CA. Randomized controlled clinical trial of point-of-care, limited ultrasonography for trauma in the emergency department: the first sonography outcomes assessment program trial. *Ann Emerg Med*. 2006; 48: 227–235. <https://doi.org/10.1016/j.annemergmed.2006.01.008> PMID: 16934640

20. Mercaldi CJ, Lanes SF. Ultrasound guidance decreases complications and improves the cost of care among patients undergoing thoracentesis and paracentesis. *Chest*. 2013; 143: 532–538. <https://doi.org/10.1378/chest.12-0447> PMID: 23381318
21. Vezzani A, Manca T, Vercelli A, Braghieri A, Magnacavallo A. Ultrasonography as a guide during vascular access procedures and in the diagnosis of complications. *J Ultrasound*. 2013; 16: 161–170. <https://doi.org/10.1007/s40477-013-0046-5> PMID: 24432170
22. Patel PA, Ernst FR, Gunnarsson CL. Evaluation of hospital complications and costs associated with using ultrasound guidance during abdominal paracentesis procedures. *J Med Econ*. 2012; 15: 1–7. <https://doi.org/10.3111/13696998.2011.628723> PMID: 22011070
23. Patel PA, Ernst FR, Gunnarsson CL. Ultrasonography guidance reduces complications and costs associated with thoracentesis procedures. *J Clin Ultrasound JCU*. 2012; 40: 135–141. <https://doi.org/10.1002/jcu.20884> PMID: 21994047
24. Ferrada P, Wolfe L, Anand RJ, Whelan J, Vanguri P, Malhotra A, et al. Use of limited transthoracic echocardiography in patients with traumatic cardiac arrest decreases the rate of nontherapeutic thoracotomy and hospital costs. *J Ultrasound Med Off J Am Inst Ultrasound Med*. 2014; 33: 1829–1832. <https://doi.org/10.7863/ultra.33.10.1829> PMID: 25253830
25. Branney SW, Moore EE, Cantrill SV, Burch JM, Terry SJ. Ultrasound based key clinical pathway reduces the use of hospital resources for the evaluation of blunt abdominal trauma. *J Trauma*. 1997; 42: 1086–1090. PMID: 9210546
26. Smith-Bindman R, Aubin C, Bailitz J, Bengiamin RN, Camargo CA, Corbo J, et al. Ultrasonography versus computed tomography for suspected nephrolithiasis. *N Engl J Med*. 2014; 371: 1100–1110. <https://doi.org/10.1056/NEJMoa1404446> PMID: 25229916
27. Oks M, Cleven KL, Cardenas-Garcia J, Schaub JA, Koenig S, Cohen RI, et al. The effect of point-of-care ultrasonography on imaging studies in the medical ICU: a comparative study. *Chest*. 2014; 146: 1574–1577. <https://doi.org/10.1378/chest.14-0728> PMID: 25144593
28. Hallett D, Javedani PP, Mosier J. Ultrasound Protocol Use in the Evaluation of an Unstable Patient. *Ultrasound Clin*. 2014; 9: 293–306. <https://doi.org/10.1016/j.cult.2014.01.006>
29. McLario DJ, Sivitz AB. Point-of-Care Ultrasound in Pediatric Clinical Care. *JAMA Pediatr*. 2015; 169: 594–600. <https://doi.org/10.1001/jamapediatrics.2015.22> PMID: 25893571
30. Marin JR, Lewiss RE, American Academy of Pediatrics, Committee on Pediatric Emergency Medicine, Society for Academic Emergency Medicine, Academy of Emergency Ultrasound, American College of Emergency Physicians, Pediatric Emergency Medicine Committee, World Interactive Network Focused on Critical Ultrasound. Point-of-care ultrasonography by pediatric emergency medicine physicians. *Pediatrics*. 2015; 135: e1113–1122. <https://doi.org/10.1542/peds.2015-0343> PMID: 25825532
31. American College of Emergency Physicians. Emergency ultrasound guidelines. *Ann Emerg Med*. 2009; 53: 550–570. <https://doi.org/10.1016/j.annemergmed.2008.12.013> PMID: 19303521
32. Kaplan A, Mayo PH. Echocardiography performed by the pulmonary/critical care medicine physician. *Chest*. 2009; 135: 529–535. <https://doi.org/10.1378/chest.08-0818> PMID: 19201715
33. Gallagher RA, Levy JA. Advances in point-of-care ultrasound in pediatric emergency medicine: *Curr Opin Pediatr*. 2014; 26: 265–271. <https://doi.org/10.1097/MOP.000000000000097> PMID: 24786367
34. Harris RD, Marks WM. Compact ultrasound for improving maternal and perinatal care in low-resource settings: review of the potential benefits, implementation challenges, and public health issues. *J Ultrasound Med Off J Am Inst Ultrasound Med*. 2009; 28: 1067–1076.
35. Adler D, Mgalula K, Price D, Taylor O. Introduction of a portable ultrasound unit into the health services of the Lugufu refugee camp, Kigoma District, Tanzania. *Int J Emerg Med*. 2008; 1: 261–266. <https://doi.org/10.1007/s12245-008-0074-7> PMID: 19384640
36. Kimberly HH, Murray A, Mennicke M, Liteplo A, Lew J, Bohan JS, et al. Focused maternal ultrasound by midwives in rural Zambia. *Ultrasound Med Biol*. 2010; 36: 1267–1272. <https://doi.org/10.1016/j.ultrasmedbio.2010.05.017> PMID: 20691916
37. Maru DS-R, Schwarz R, Jason A, Basu S, Sharma A, Moore C. Turning a blind eye: the mobilization of radiology services in resource-poor regions. *Glob Health*. 2010; 6: 18. <https://doi.org/10.1186/1744-8603-6-18> PMID: 20946643
38. WHO. Training in diagnostic ultrasound: essentials, principles and standards. Report of a WHO Study Group. *World Health Organ Tech Rep Ser*. 1998; 875: i–46; back cover. PMID: 9659004
39. Dean AJ, Ku BS, Zeserson EM. The utility of handheld ultrasound in an austere medical setting in Guatemala after a natural disaster. *Am J Disaster Med*. 2007; 2: 249–256. PMID: 18491840
40. Mindel S. Role of imager in developing world. *Lancet Lond Engl*. 1997; 350: 426–429. [https://doi.org/10.1016/S0140-6736\(97\)03340-0](https://doi.org/10.1016/S0140-6736(97)03340-0)

41. Groen RS, Leow JJ, Sadasivam V, Kushner AL. Review: indications for ultrasound use in low- and middle-income countries. *Trop Med Int Health TM IH*. 2011; 16: 1525–1535. <https://doi.org/10.1111/j.1365-3156.2011.02868.x> PMID: 21883723
42. Sippel S, Muruganandan K, Levine A, Shah S. Review article: Use of ultrasound in the developing world. *Int J Emerg Med*. 2011; 4: 72. <https://doi.org/10.1186/1865-1380-4-72> PMID: 22152055
43. Stolz LA, Muruganandan KM, Bisanzo MC, Sebikali MJ, Dreifuss BA, Hammerstedt HS, et al. Point-of-care ultrasound education for non-physician clinicians in a resource-limited emergency department. *Trop Med Int Health TM IH*. 2015; 20: 1067–1072. <https://doi.org/10.1111/tmi.12511> PMID: 25808431
44. Stolz LA, Kizza H, Little K, Kasekende J. Intussusception detected with ultrasound in a resource-limited setting. *Lancet Lond Engl*. 2013; 381: 2054. [https://doi.org/10.1016/S0140-6736\(13\)60690-X](https://doi.org/10.1016/S0140-6736(13)60690-X)
45. Shah SP, Epino H, Bukhman G, Umulisa I, Dushimiyimana JMV, Reichman A, et al. Impact of the introduction of ultrasound services in a limited resource setting: rural Rwanda 2008. *BMC Int Health Hum Rights*. 2009; 9: 4. <https://doi.org/10.1186/1472-698X-9-4> PMID: 19327157
46. Shah S, Noble VE, Umulisa I, Dushimiyimana JMV, Bukhman G, Mukherjee J, et al. Development of an ultrasound training curriculum in a limited resource international setting: successes and challenges of ultrasound training in rural Rwanda. *Int J Emerg Med*. 2008; 1: 193–196. <https://doi.org/10.1007/s12245-008-0053-z> PMID: 19384515
47. Flores AH, Kassamali S, Won GY, Stein JC, Reynolds T. Frequency of utilisation of ultrasound in the diagnosis of ectopic pregnancy in Sub-Saharan Africa countries: A systematic review. *Afr J Emerg Med*. 2015; 5: 31–36. <https://doi.org/10.1016/j.afjem.2014.08.001>
48. Aboud M, Mkony C, Wustner M. Elective Abdominal Ultrasonography by Surgeons at MNH, Dar Es Salaam, Tanzania. *East and Central African Journal of Surgery*. 2006; 11: 52–56.
49. Mets T. Clinical ultrasound in developing countries. *Lancet Lond Engl*. 1991; 337: 358.
50. Reynolds TA, Noble J, Paschal G, Sawe HR, Sohoni A, Shah S, et al. Bedside ultrasound training at Muhimbili National Hospital in Dar es Salaam, Tanzania and Hospital San Carlos in Chiapas, Mexico. *Afr J Emerg Med*. 2016; 6: 125–131. <https://doi.org/10.1016/j.afjem.2016.03.001>
51. Kotlyar S, Moore CL. Assessing the utility of ultrasound in Liberia. *J Emerg Trauma Shock*. 2008; 1: 10–14. <https://doi.org/10.4103/0974-2700.41785> PMID: 19561936
52. Henwood PC, Mackenzie DC, Rempell JS, Murray AF, Leo MM, Dean AJ, et al. A practical guide to self-sustaining point-of-care ultrasound education programs in resource-limited settings. *Ann Emerg Med*. 2014; 64: 277–285.e2. <https://doi.org/10.1016/j.annemergmed.2014.04.013> PMID: 24875894
53. Henwood PC, Beversluis D, Genthon AA, Wilson CN, Norwood B, Silva D, et al. Characterizing the limited use of point-of-care ultrasound in Colombian emergency medicine residencies. *Int J Emerg Med*. 2014; 7: 7. <https://doi.org/10.1186/1865-1380-7-7> PMID: 24499650
54. Ahmad S, Kampondeni S, Molyneux E. An experience of emergency ultrasonography in children in a sub-Saharan setting. *Emerg Med J EMJ*. 2006; 23: 335–340. <https://doi.org/10.1136/emj.2005.028761> PMID: 16627831
55. Reynolds TA, Mfinanga JA, Sawe HR, Runyon MS, Mwafongo V. Emergency care capacity in Africa: a clinical and educational initiative in Tanzania. *J Public Health Policy*. 2012; 33 Suppl 1: S126–37. <https://doi.org/10.1057/jphp.2012.41> PMID: 23254838
56. About us—MUHIMBILI NATIONAL HOSPITAL [Internet]. [cited 31 Jul 2015]. <http://www.mnh.or.tz/index.php/about>
57. Partners In Health. Manual of Ultrasound for Resource-Limited Settings [Internet]. 2011 [cited 17 May 2017]. <http://www.pih.org/library/manual-of-ultrasound-for-resource-limited-settings>
58. HCUP-US Home Page [Internet]. [cited 4 Mar 2017]. <https://www.hcup-us.ahrq.gov/>
